# Supplementary material
Source: publisher figshare collection journal article supplement (https://sage.figshare.com/ndownloader/files/23757647)
Supplement: Supplementary file 1 [file 23757647]

## Mediation analysis using PROCESS

The PROCESS macro was developed by Andrew F. Hayes and can be downloaded at <http://www.processmacro.org/index.html>. In the data analysis for this study, we used the SPSS version (v3.3); a macro for SAS is available as well, and a version for R will be published in 2020. After downloading and extracting the macro files, we installed the PROCESS custom dialogue (process.spd) in SPSS.

For further information, please see the website with detailed descriptions and documentation, and also see:

- Hayes AF (2017) *Introduction to mediation, moderation, and conditional process analysis: A regression-based approach*. Second edition. New York, NY, US: Guilford Press.
- Hayes AF and Rockwood NJ (2020) Conditional Process Analysis: Concepts, Computation, and Advances in the Modeling of the Contingencies of Mechanisms. *American Behavioral Scientist* 64(1): 19-54.

In order to test hypotheses H1b, H2b, and H4, we used mediation model 4 (see model templates in the Appendix of Hayes, 2017) with a single mediator. The syntax can be found in the file SPSS\_Process\_Syntax.sps; the results are documented in SPSS\_Process\_Results.spv.
